# Supplementary material for: The Anti-HIV Actions of 7- and 10-Substituted Camptothecins
Source: Molecules. 2009 Dec 31;15(1):138–48. doi: 10.3390/molecules15010138 (PMC6256925; doi:10.3390/molecules15010138)
Supplement: Supplementary File 1 [file molecules-15-00138-s001.pdf]

Correction

## Chen, Zheng, *et al.* Anti-HIV Actions of 7- and 10-Substituted Camptothecins. *Molecules*, 2010, 15, 138-148

Yong-Tang Zheng

Key Laboratory of Animal Models and Human Disease Mechanisms of Chinese Academy of Sciences & Yunnan Province, Kunming Institute of Zoology, Chinese Academy of Sciences, Kunming, Yunnan 650223, China

Received: 3 January 2010 / Published: 4 January 2010

---

The author list, affiliations and contact information of this paper [1] are revised to read as follows:

**Yu-Ye Li** <sup>1,2,3,†</sup>, **Ying-Qian Liu** <sup>4,†</sup>, **Liu-Meng Yang** <sup>1</sup>, **Rui-Rui Wang** <sup>1</sup>, **Wei Pang** <sup>1</sup>, **Shi-Wu Chen** <sup>4</sup>  
**Xuan Tian** <sup>4,\*</sup> and **Yong-Tang Zheng** <sup>1,\*</sup>

<sup>1</sup> Key Laboratory of Animal Models and Human Disease Mechanisms of Chinese Academy of Sciences & Yunnan Province, Kunming Institute of Zoology, Chinese Academy of Sciences, Kunming, Yunnan 650223, China

<sup>2</sup> Graduate School of the Chinese Academy of Sciences, Beijing 100039, China

<sup>3</sup> The First Affiliated Hospital of Kunming Medical College, Kunming, Yunnan 650032, China

<sup>4</sup> State Key Laboratory of Applied Organic Chemistry, Lanzhou University, Lanzhou 730000, China

<sup>†</sup> These authors contributed equally to this work.

\* Authors to whom correspondence should be addressed; E-Mail: zhengyt@mail.kiz.ac.cn (Y.-T.Z.); xuant@lzu.edu.cn (X.T.); Tel./Fax: +86 871 5195684 (Y.-T.Z).

## References

1. Li, Y.-Y.; Chen, S.-W.; Yang, L.-M.; Wang, R.-R.; Pang, W.; Zheng, Y.-T. The Anti-HIV Actions of 7- and 10-Substituted Camptothecins. *Molecules* **2010**, *15*, 138-148.

© 2010 by the authors; licensee Molecular Diversity Preservation International, Basel, Switzerland. This article is an open-access article distributed under the terms and conditions of the Creative Commons Attribution license (<http://creativecommons.org/licenses/by/3.0/>).
